# Supplementary material for: Effects of Nicorandil on Inflammation, Apoptosis and Atherosclerotic Plaque Progression
Source: PubMed Central journal article supplement (PMC7912627; doi:10.3390/biomedicines9020120), 2021-01-27
Supplement: biomedicines-09-00120-s001.pdf [file biomedicines-09-00120-s001.pdf]

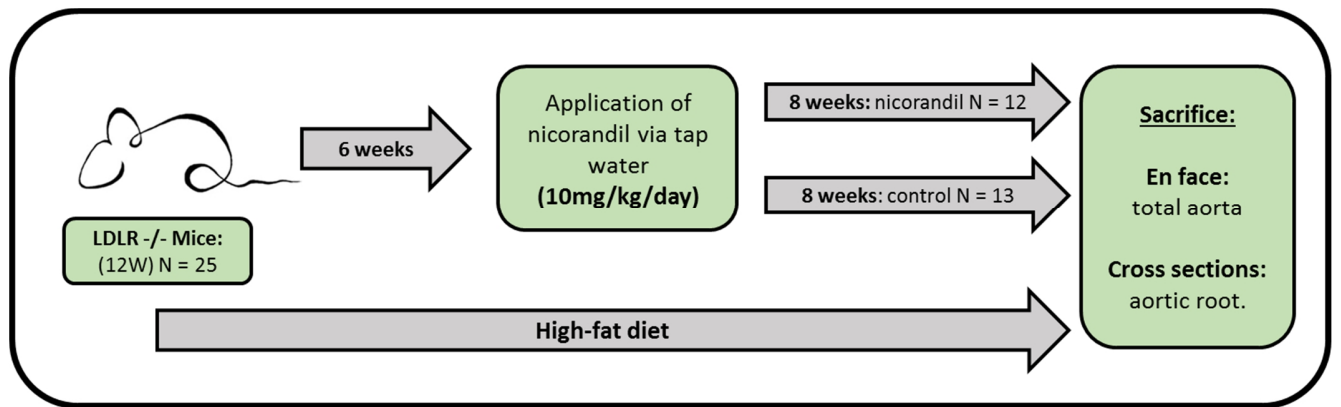

Supplementary Figure 1: Overview of the treatment regime.
